# Supplementary material for: Synthesis and Structural Analysis of Chiral Bis-dihydro[1,3]-naphthoxazines and Imidazolidine Derivatives Prepared by Three-Component Mannich-Type Condensation
Source: MDPI journal article supplement (doi:10.3390/cryst13101495), 2023-10-14
Supplement: s1 [file s1]

## Supporting Information

# Synthesis and Structural Analysis of Chiral Bis-dihydro[1,3]-naphthoxazines and Imidazolidine Derivatives Prepared by Three-Component Mannich-Type Condensation

Maya Tavlinova-Kirilova <sup>1</sup>, Krasimira Dikova <sup>1</sup>, Maya K. Marinova <sup>1</sup>, Mariana Kamenova-Nacheva <sup>1</sup>, Rusi Rusew <sup>2</sup>, Hristina Sbirkova-Dimitrova <sup>2</sup>, Boris Shivachev <sup>2,\*</sup>, Kalina Kostova <sup>1</sup> and Vladimir Dimitrov <sup>1,\*</sup>

<sup>1</sup> Institute of Organic Chemistry with Centre of Phytochemistry, Bulgarian Academy of Sciences, Acad. G. Bonchev Street, bl. 9, 1113 Sofia, Bulgaria

<sup>2</sup> Institute of Mineralogy and Crystallography "Acad. Ivan Kostov", Bulgarian Academy of Sciences, Acad. G. Bonchev Street, bl. 107, 1113 Sofia, Bulgaria

\* Correspondence: blshivachev@gmail.com (B.S.); Vladimir.Dimitrov@orgchm.bas.bg (V.D.)

|                                                                                                         |    |
|---------------------------------------------------------------------------------------------------------|----|
| Figure S1. The <sup>1</sup> H NMR spectrum of compound <b>3</b> .....                                   | 3  |
| Figure S2. The <sup>13</sup> C NMR spectrum of compound <b>3</b> .....                                  | 4  |
| Figure S3. The DEPT 135 NMR spectrum of compound <b>3</b> .....                                         | 4  |
| Figure S4. The HSQC NMR spectrum of compound <b>3</b> .....                                             | 5  |
| Figure S5. The HMBC NMR spectrum of compound <b>3</b> .....                                             | 5  |
| Figure S6. The COSY NMR spectrum of compound <b>3</b> .....                                             | 5  |
| Figure S7. The HRMS spectrum of compound <b>3</b> .....                                                 | 6  |
| Figure S8. The <sup>1</sup> H NMR spectrum of compound <b>5</b> .....                                   | 7  |
| Figure S9. The <sup>13</sup> C NMR spectrum of compound <b>5</b> .....                                  | 7  |
| Figure S10. The DEPT 135 NMR spectrum of compound <b>5</b> .....                                        | 8  |
| Figure S11. The HSQC NMR spectrum of compound <b>5</b> .....                                            | 8  |
| Figure S12. The HMBC NMR spectrum of compound <b>5</b> .....                                            | 9  |
| Figure S13. The COSY NMR spectrum of compound <b>5</b> .....                                            | 9  |
| Figure S14. The HRMS spectrum of compound <b>5</b> .....                                                | 10 |
| Figure S15. The <sup>1</sup> H NMR spectrum of compound <b>8</b> (contains 16% of <b>9</b> ). ....      | 11 |
| Figure S16. The <sup>1</sup> H NMR spectra of a mixture of compounds <b>8</b> and <b>9</b> (20:19)..... | 12 |
| Figure S17. The HRMS spectrum of a mixture of compounds <b>8</b> and <b>9</b> (20:19). ....             | 13 |
| Figure S18. The <sup>1</sup> H NMR spectrum of compound ( <i>R,R</i> )- <b>9</b> .....                  | 14 |
| Figure S19. The <sup>13</sup> C NMR spectrum of compound ( <i>R,R</i> )- <b>9</b> .....                 | 14 |
| Figure S20. The DEPT 135 NMR spectrum of compound ( <i>R,R</i> )- <b>9</b> .....                        | 15 |
| Figure S21. The HSQC NMR spectrum of compound ( <i>R,R</i> )- <b>9</b> .....                            | 15 |
| Figure S22. The HMBC NMR spectrum of compound ( <i>R,R</i> )- <b>9</b> .....                            | 16 |
| Figure S23. The COSY NMR spectrum of compound ( <i>R,R</i> )- <b>9</b> .....                            | 16 |

|                                                                                                                                |    |
|--------------------------------------------------------------------------------------------------------------------------------|----|
| Figure S24. The HRMS spectrum of compound ( <i>R,R</i> )- <b>9</b> . .....                                                     | 17 |
| Table S1. Most important data collection and refinement parameters for compounds <b>3</b> and ( <i>R,R</i> )- <b>9</b> . ..... | 18 |

# NMR and HRMS Spectra of compound **3**

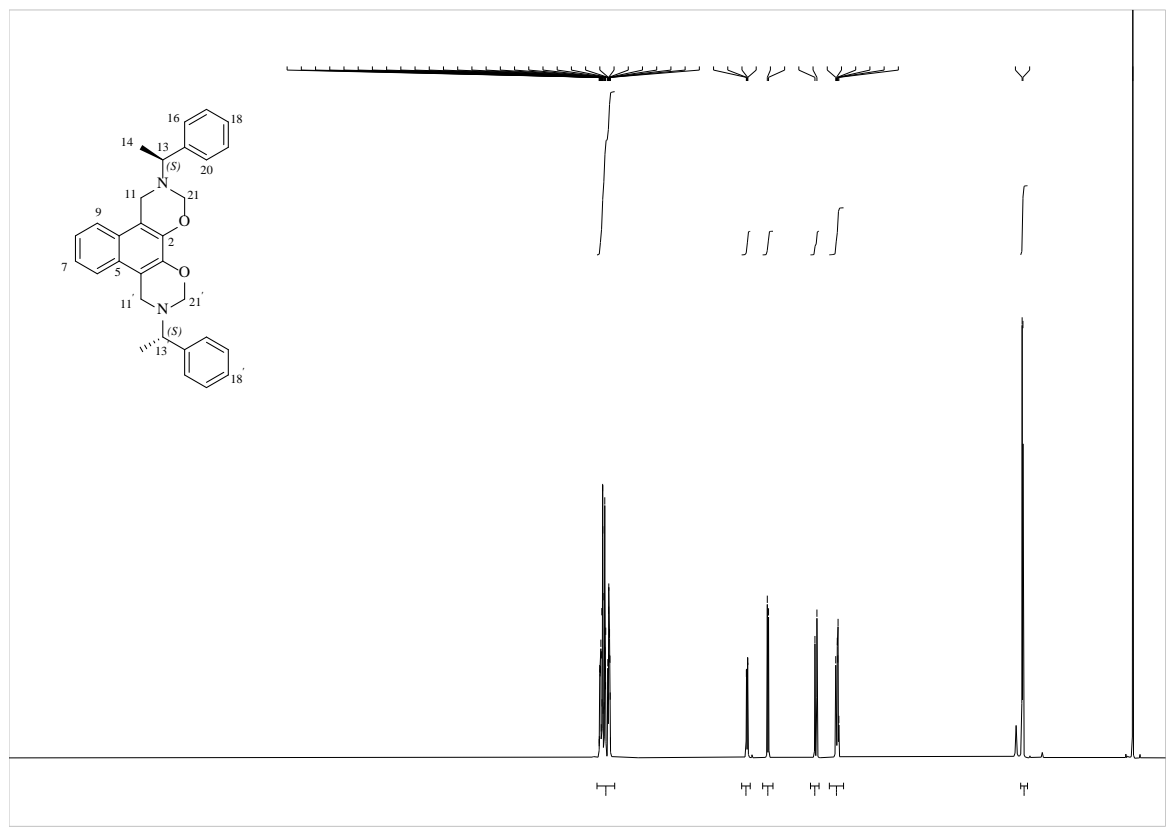

Figure S1. The  $^1\text{H}$  NMR spectrum of compound **3**.

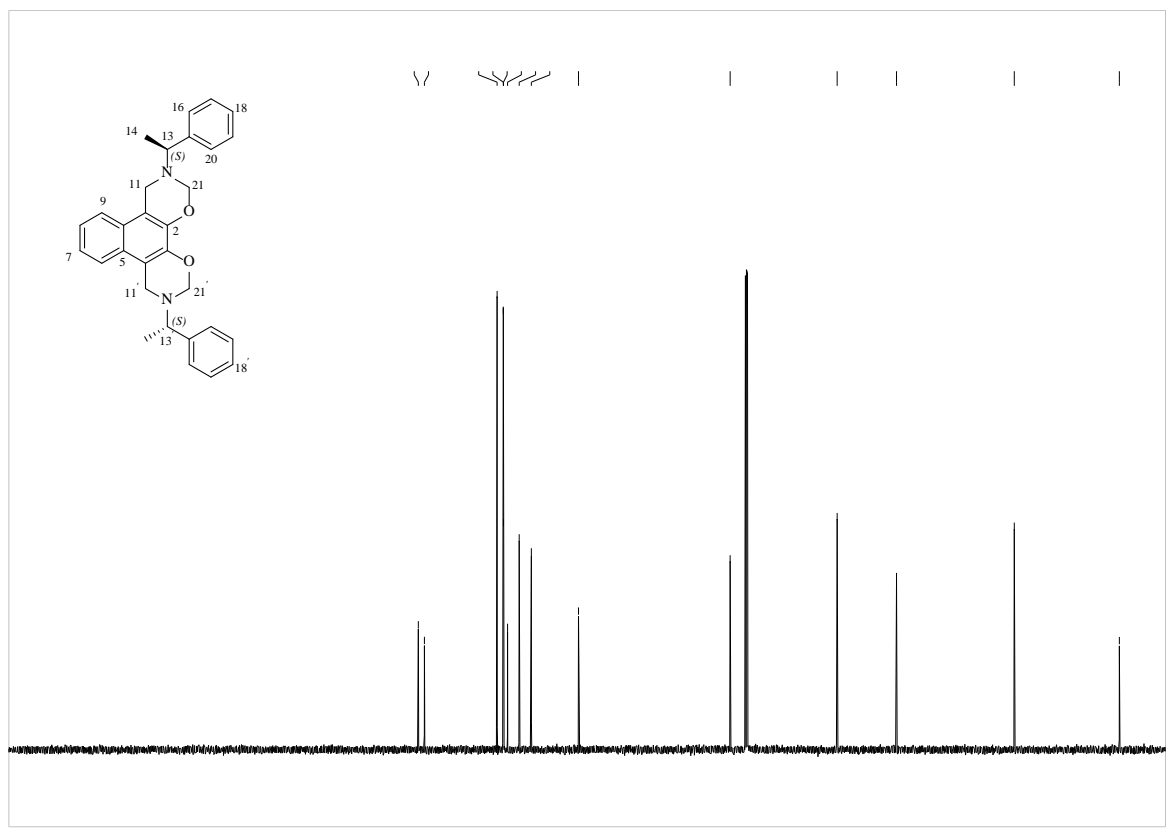

Figure S2. The  $^{13}\text{C}$  NMR spectrum of compound **3**.

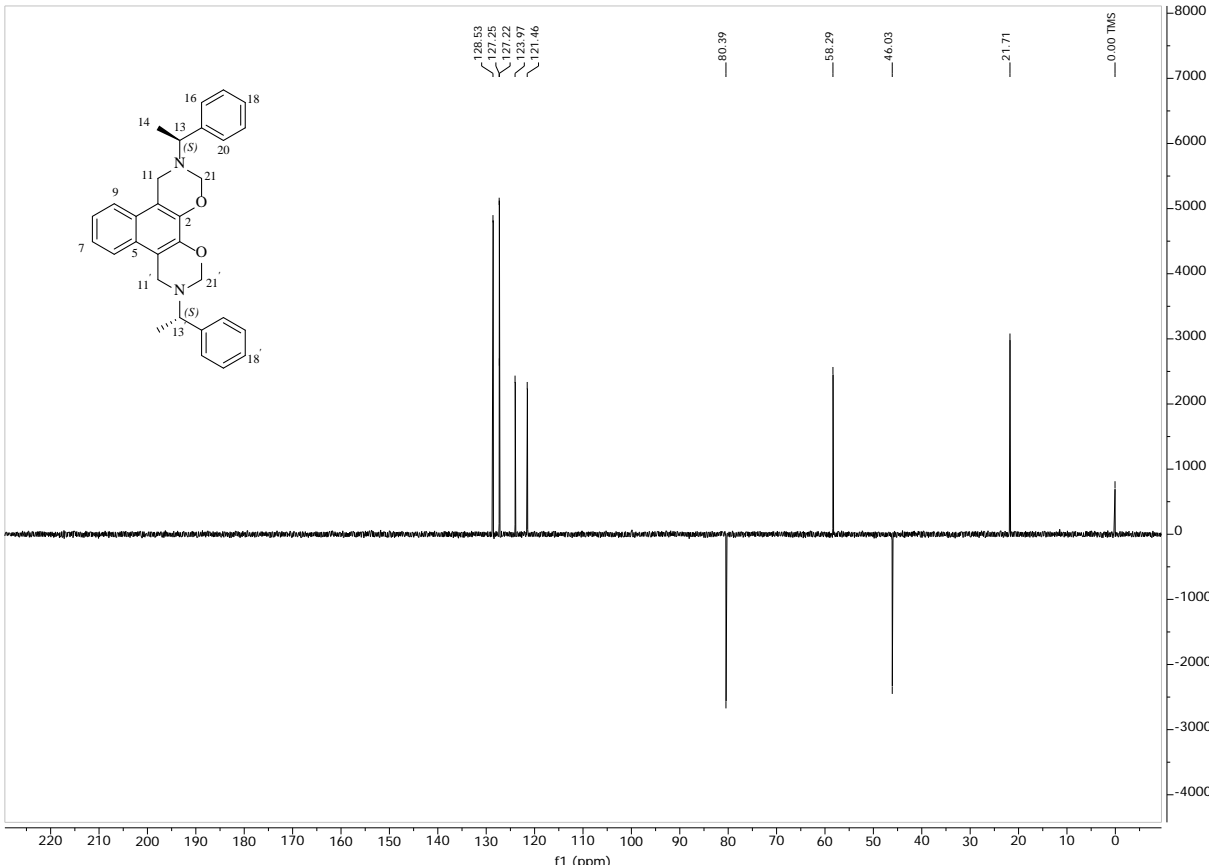

Figure S3. The DEPT 135 NMR spectrum of compound **3**.

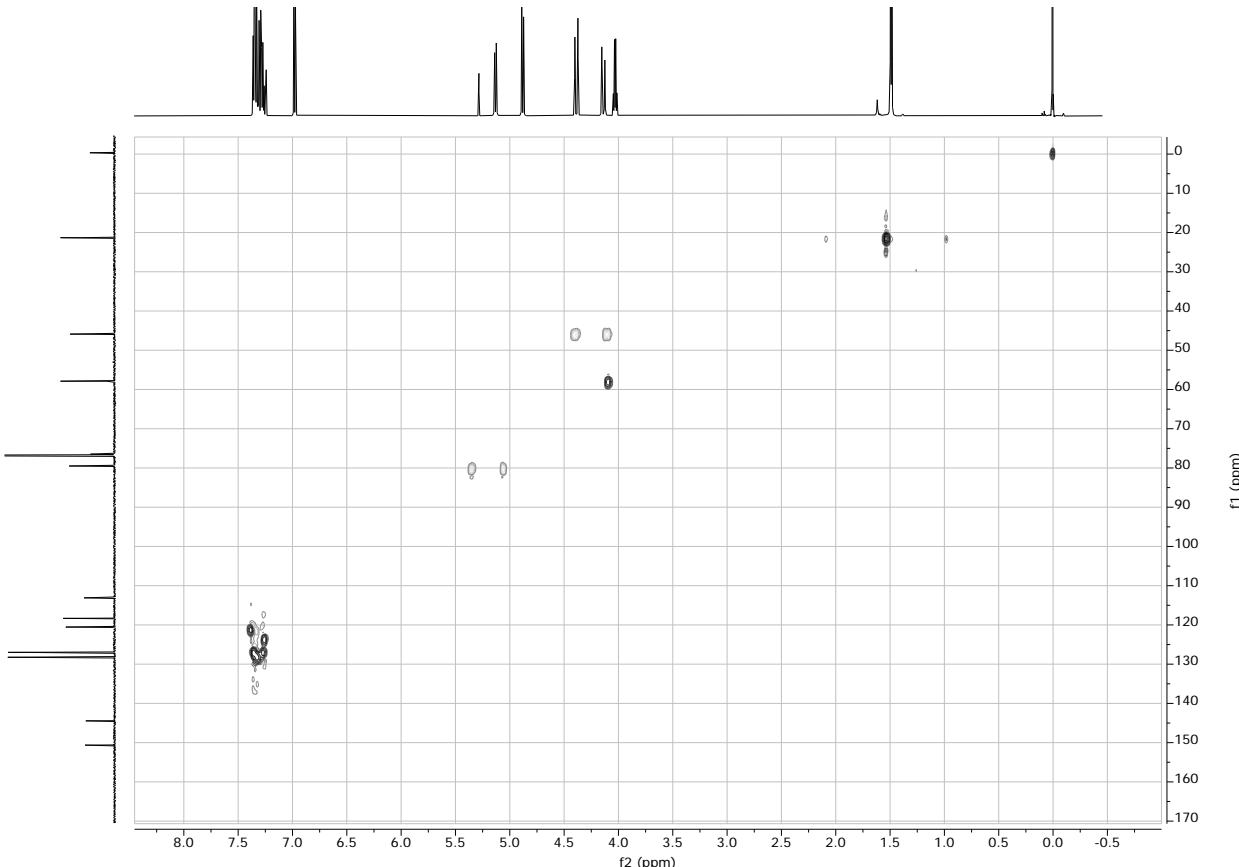

Figure S4. The HSQC NMR spectrum of compound **3**.

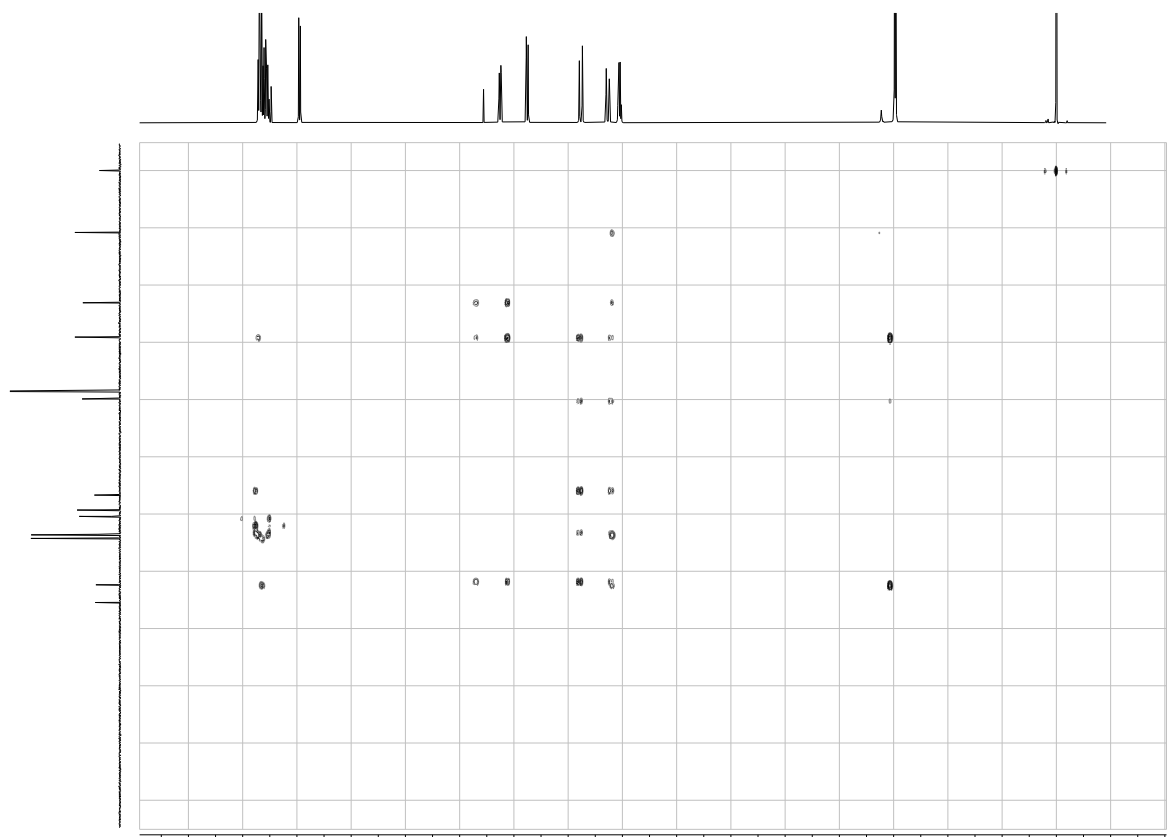

Figure S5. The HMBC NMR spectrum of compound **3**.

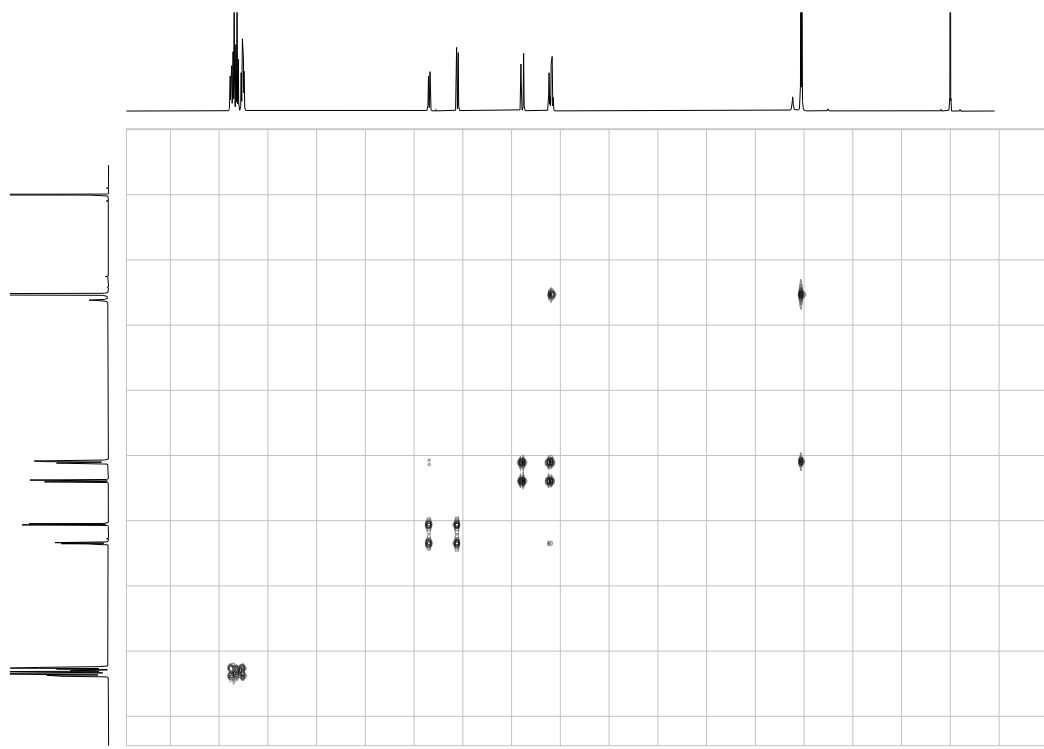

Figure S6. The COSY NMR spectrum of compound **3**.

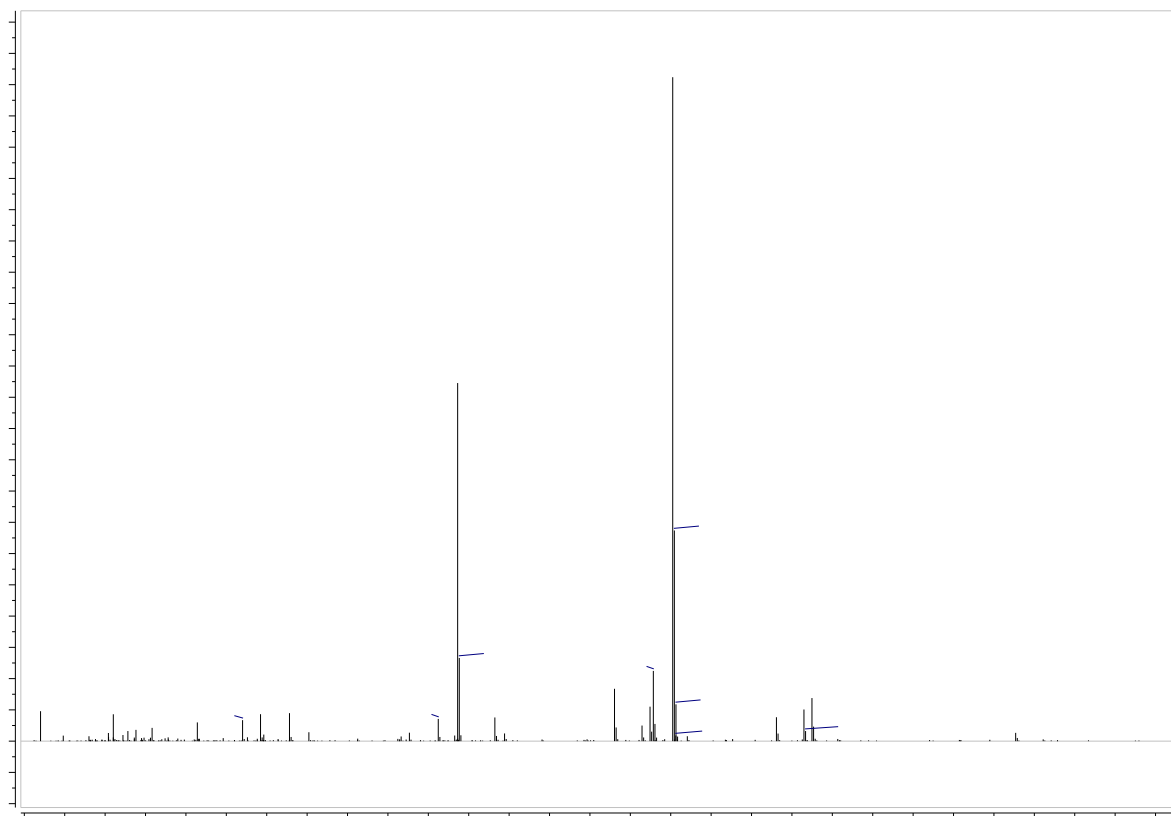

Figure S7. The HRMS spectrum of compound **3**.

# NMR and HRMS Spectra of compound **5**

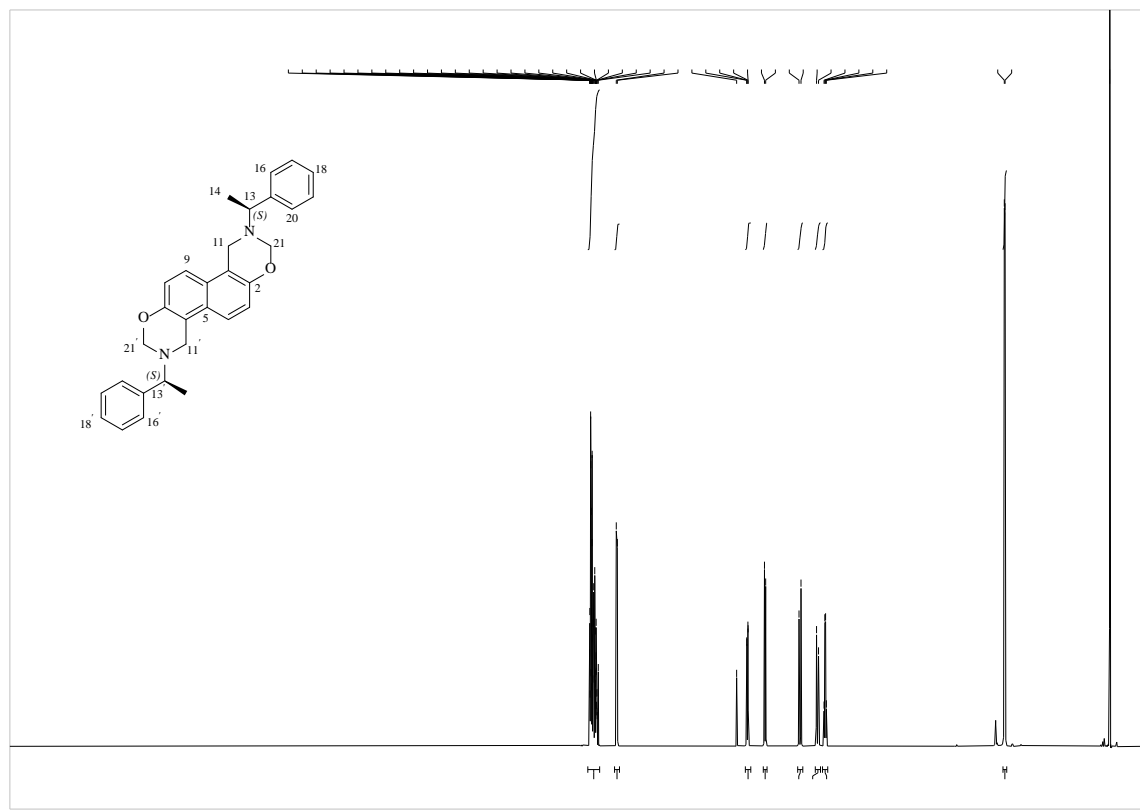

Figure S8. The  $^1\text{H}$  NMR spectrum of compound **5**.

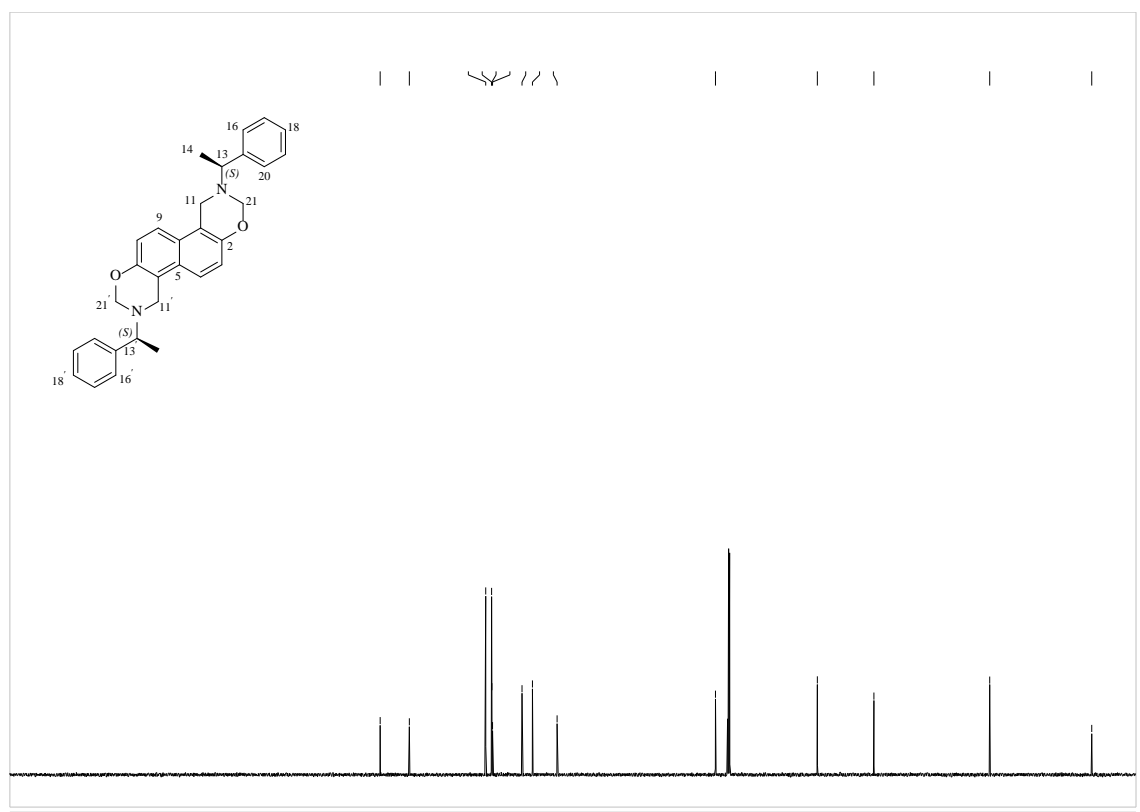

Figure S9. The  $^{13}\text{C}$  NMR spectrum of compound **5**.

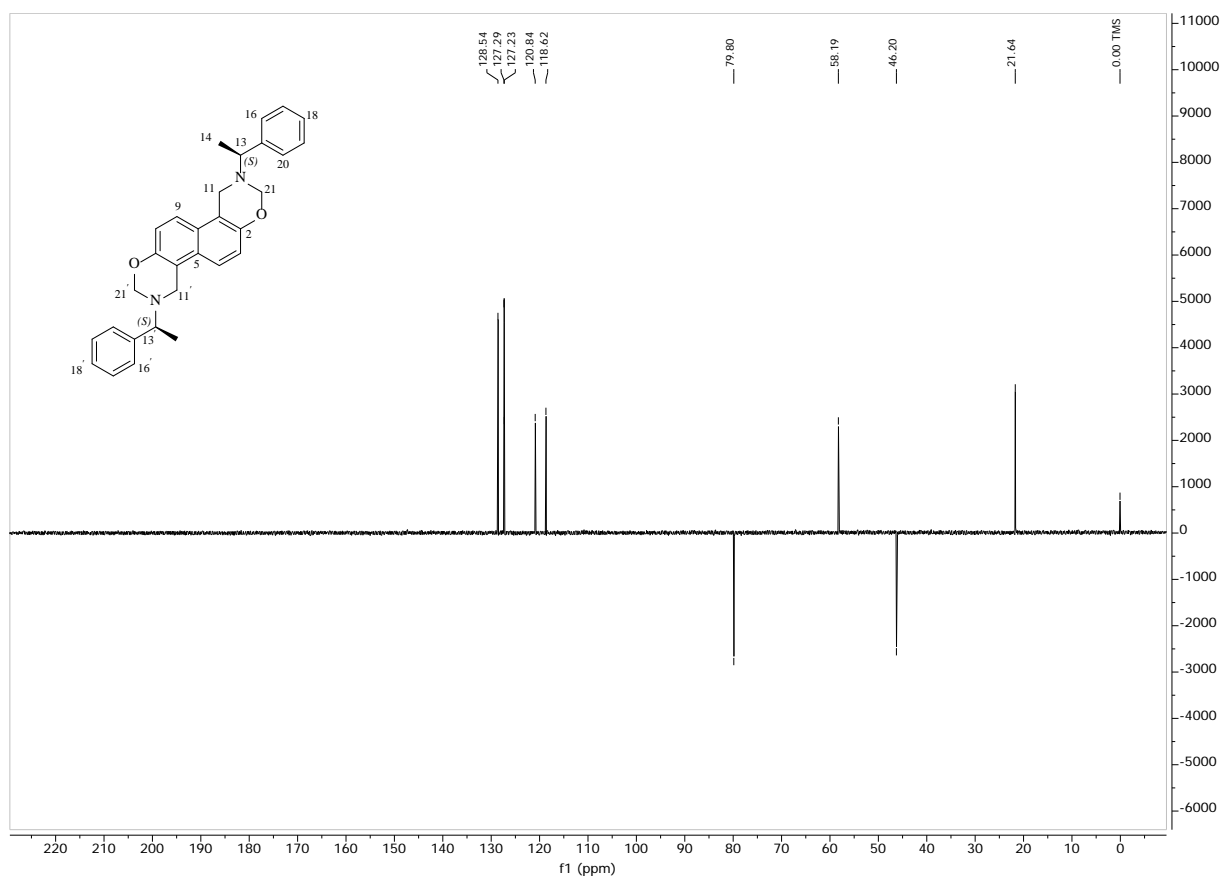

Figure S10. The DEPT 135 NMR spectrum of compound **5**.

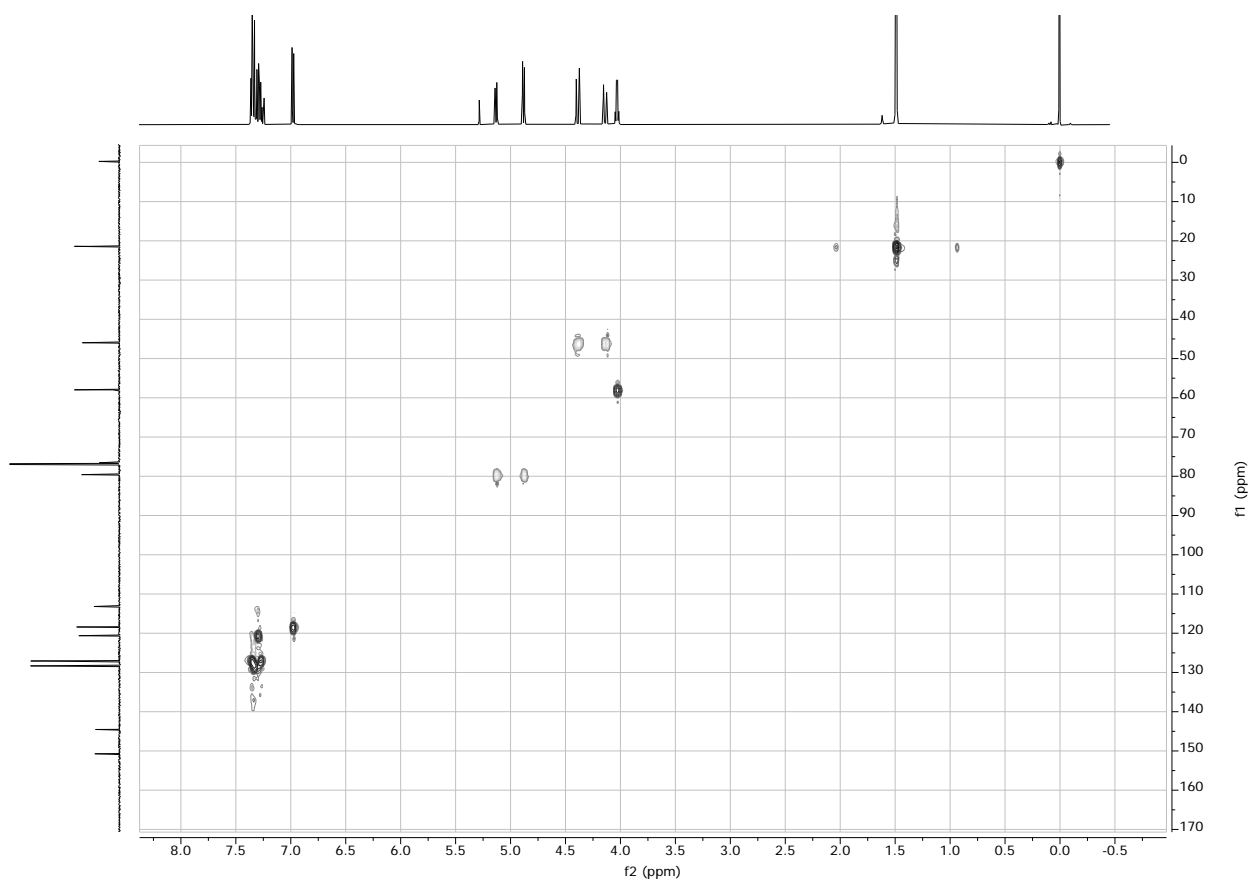

Figure S11. The HSQC NMR spectrum of compound **5**.



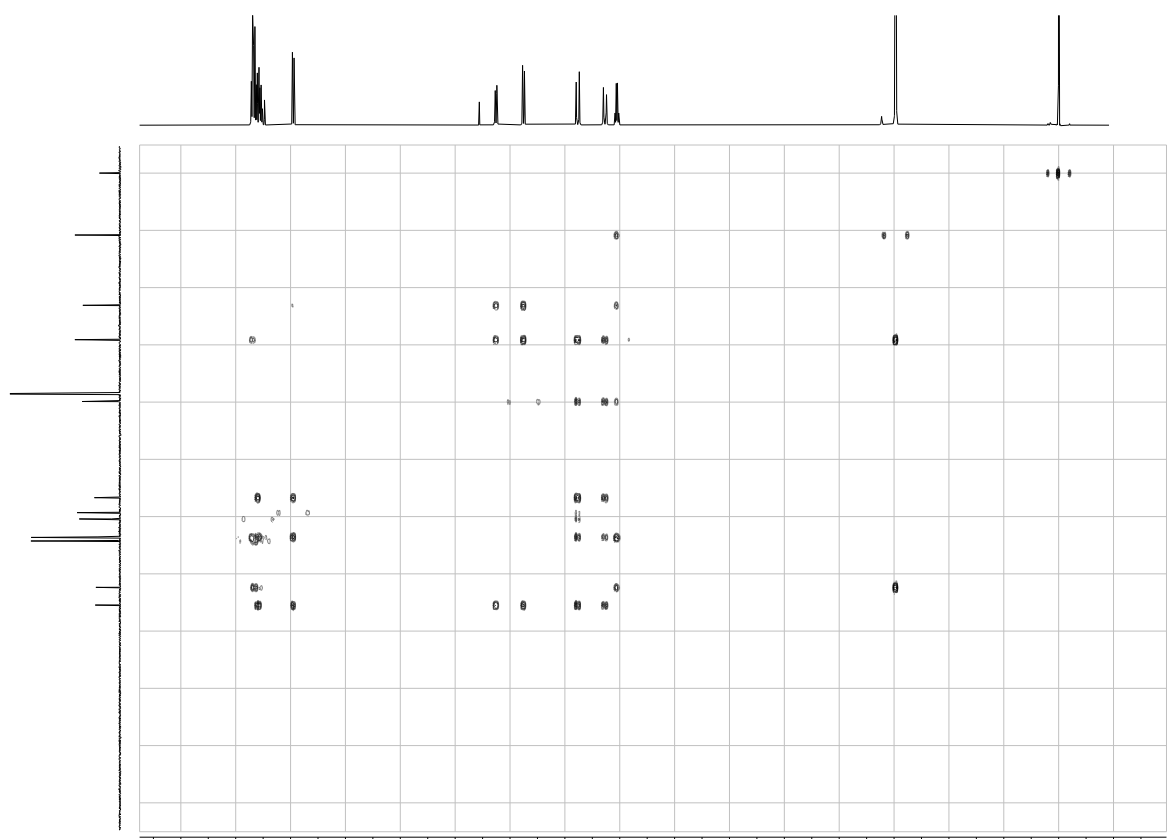

Figure S12. The HMBC NMR spectrum of compound **5**.

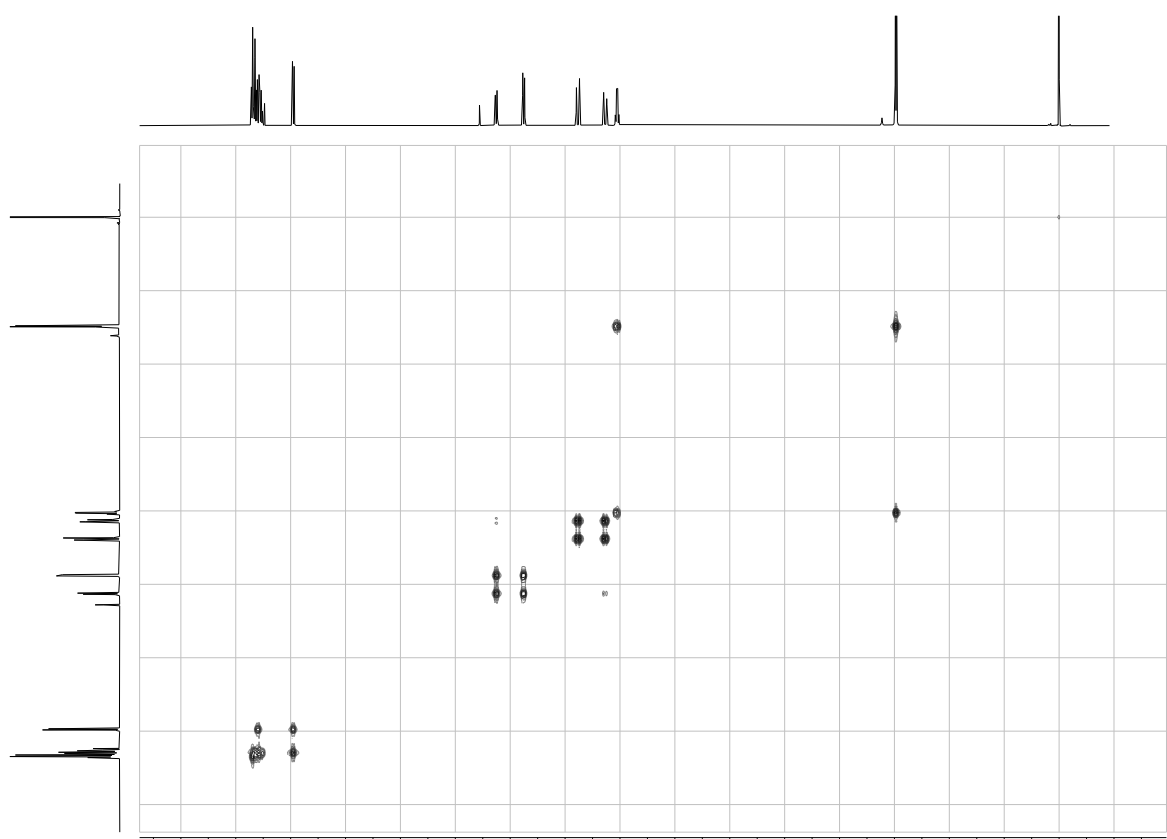

Figure S13. The COSY NMR spectrum of compound **5**.

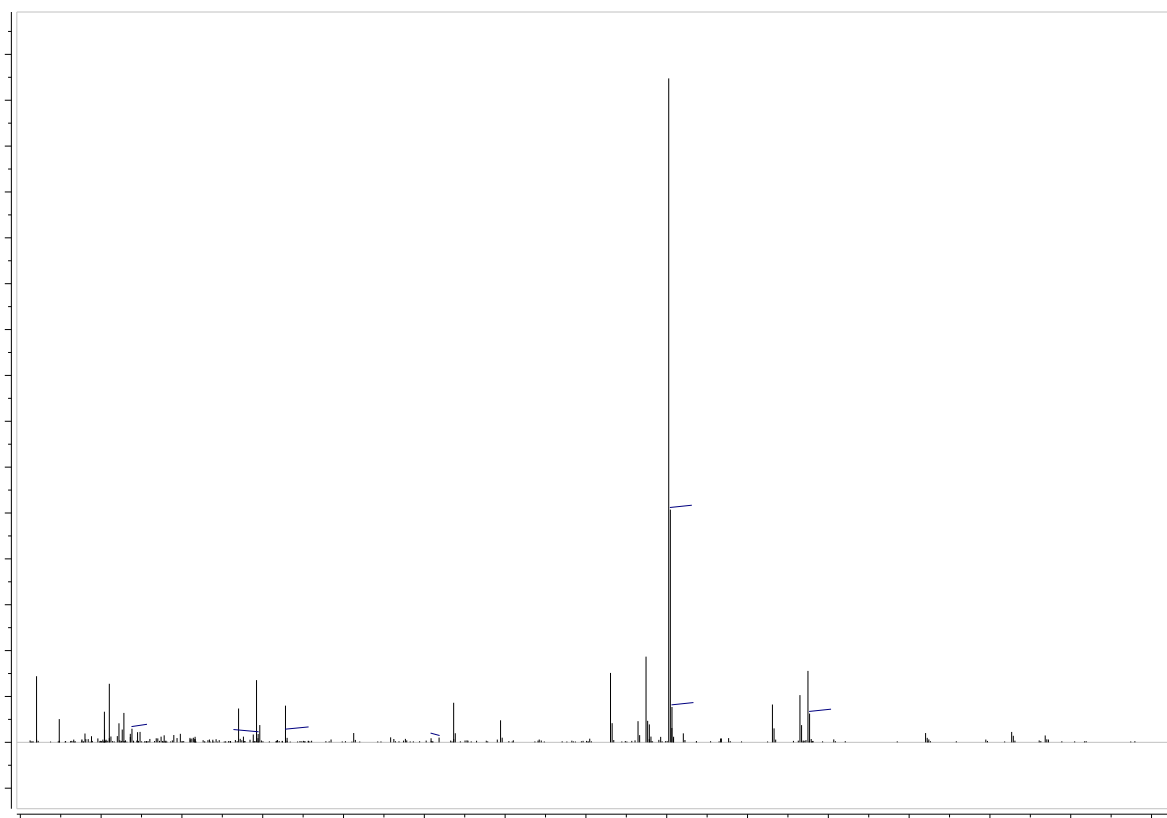

Figure S14. The HRMS spectrum of compound **5**.

NMR Spectrum of compound **8** (contains 16% of **9**)

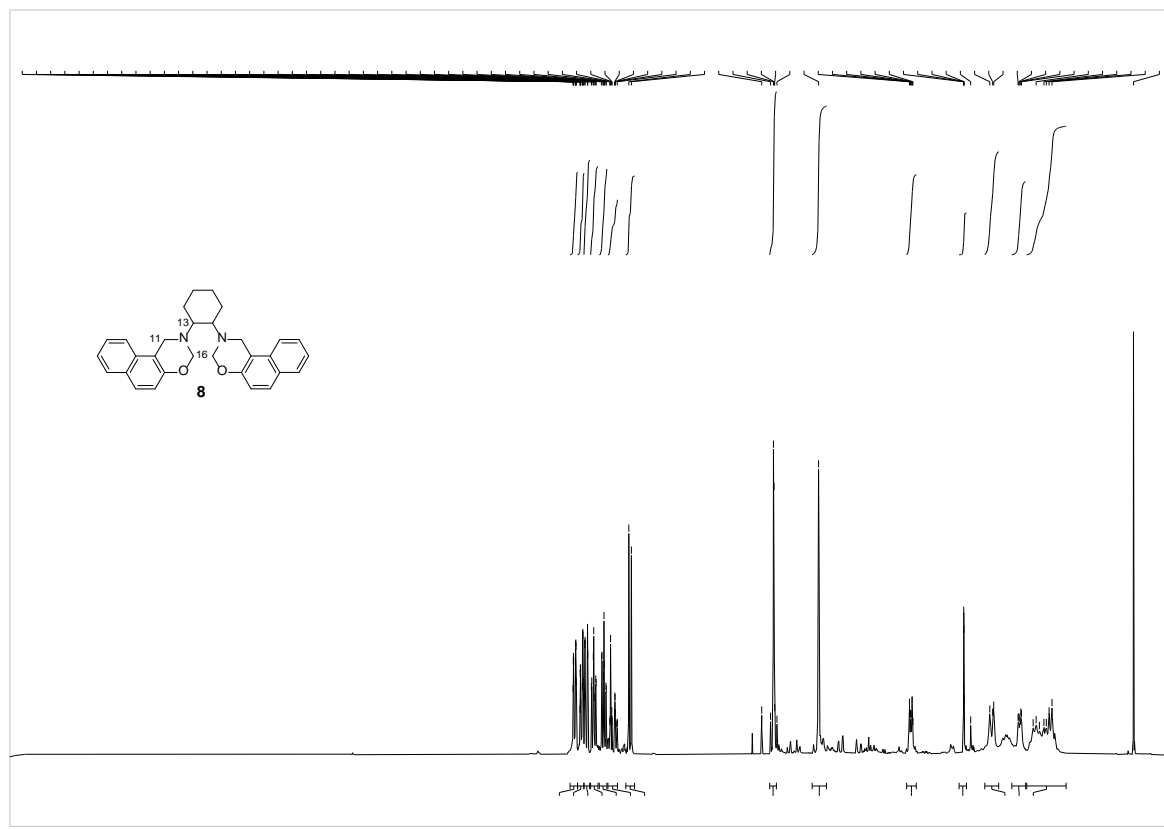

Figure S15. The  $^1\text{H}$  NMR spectrum of compound **8** (contains 16% of **9**).

# NMR and HRMS Spectra of a mixture of compounds **8** and **9** (20:19)

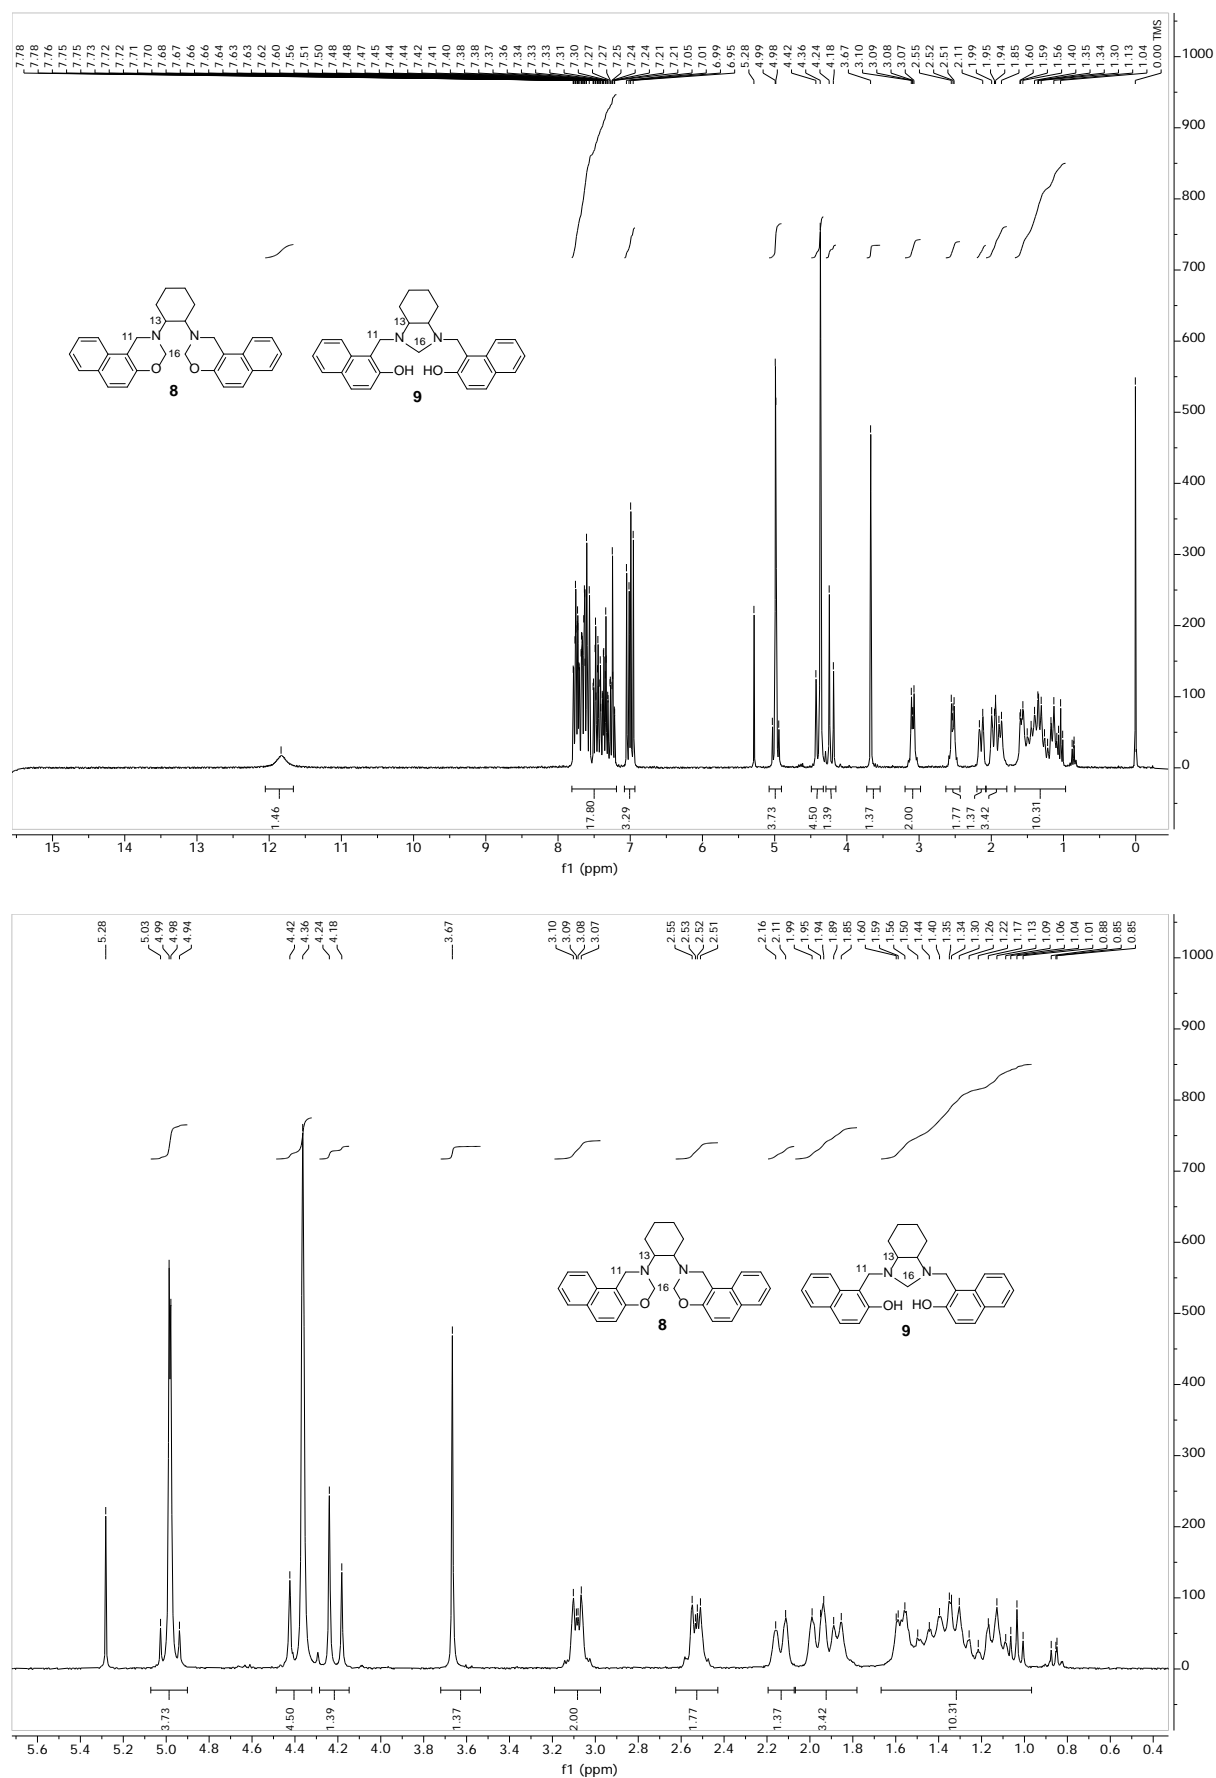

Figure S16. The  $^1\text{H}$  NMR spectra of a mixture of compounds **8** and **9** (20:19).

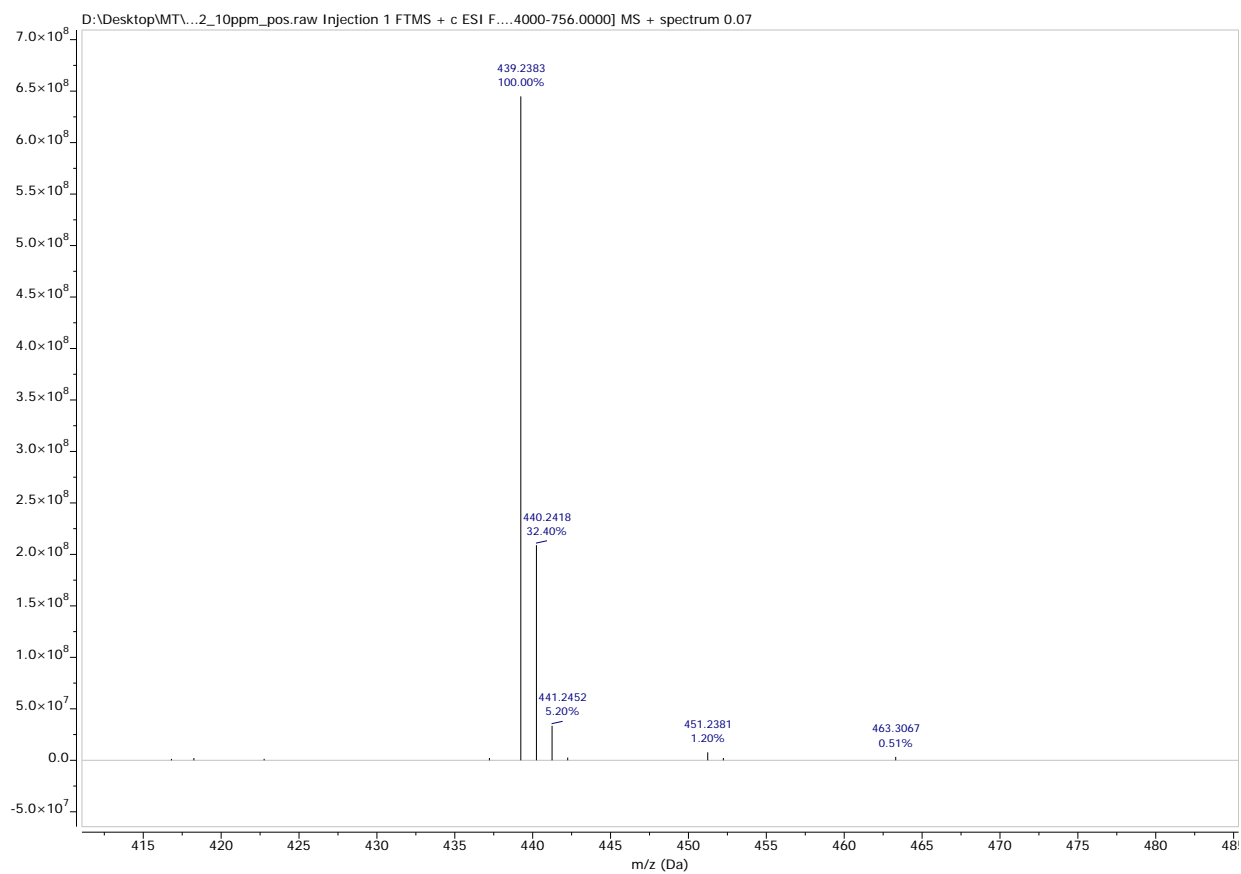

Figure S17. The HRMS spectrum of a mixture of compounds **8** and **9** (20:19).

# NMR and HRMS Spectra of compound (*R,R*)-9

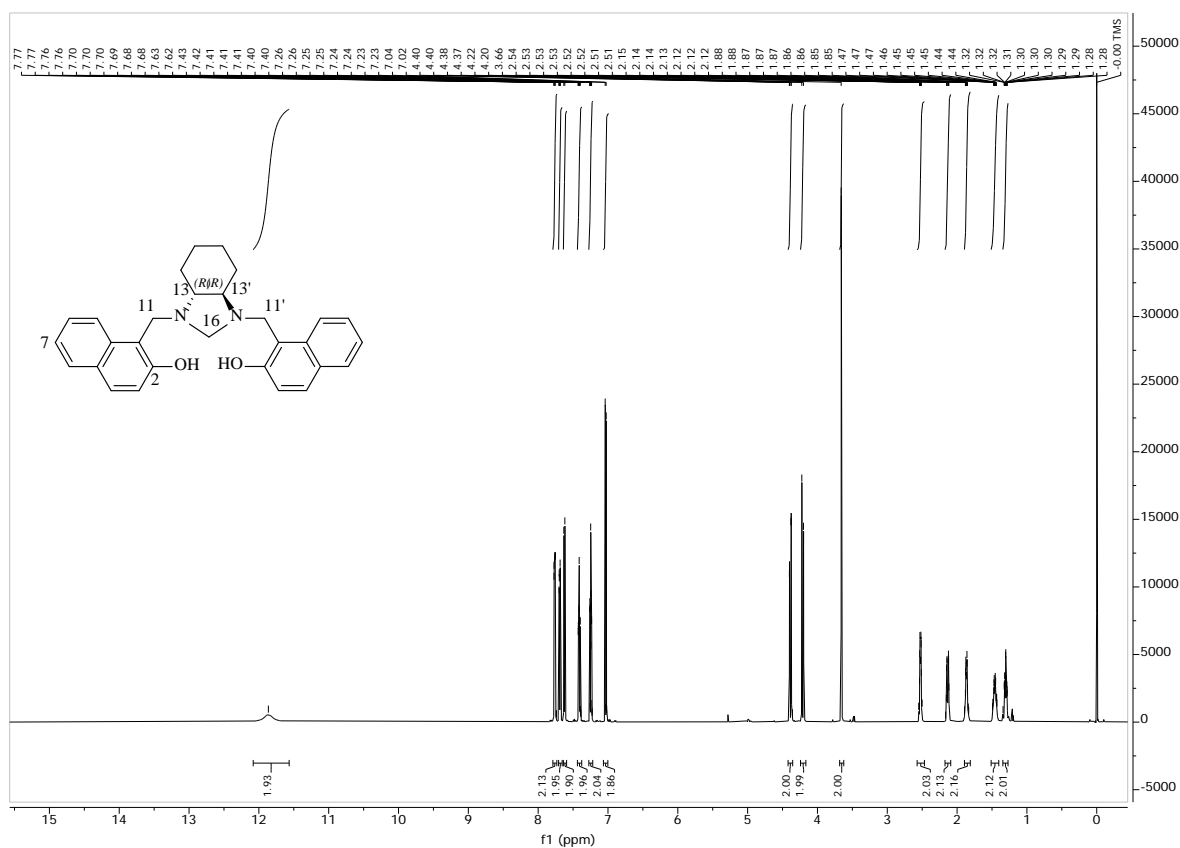

Figure S18. The  $^1\text{H}$  NMR spectrum of compound (*R,R*)-9.

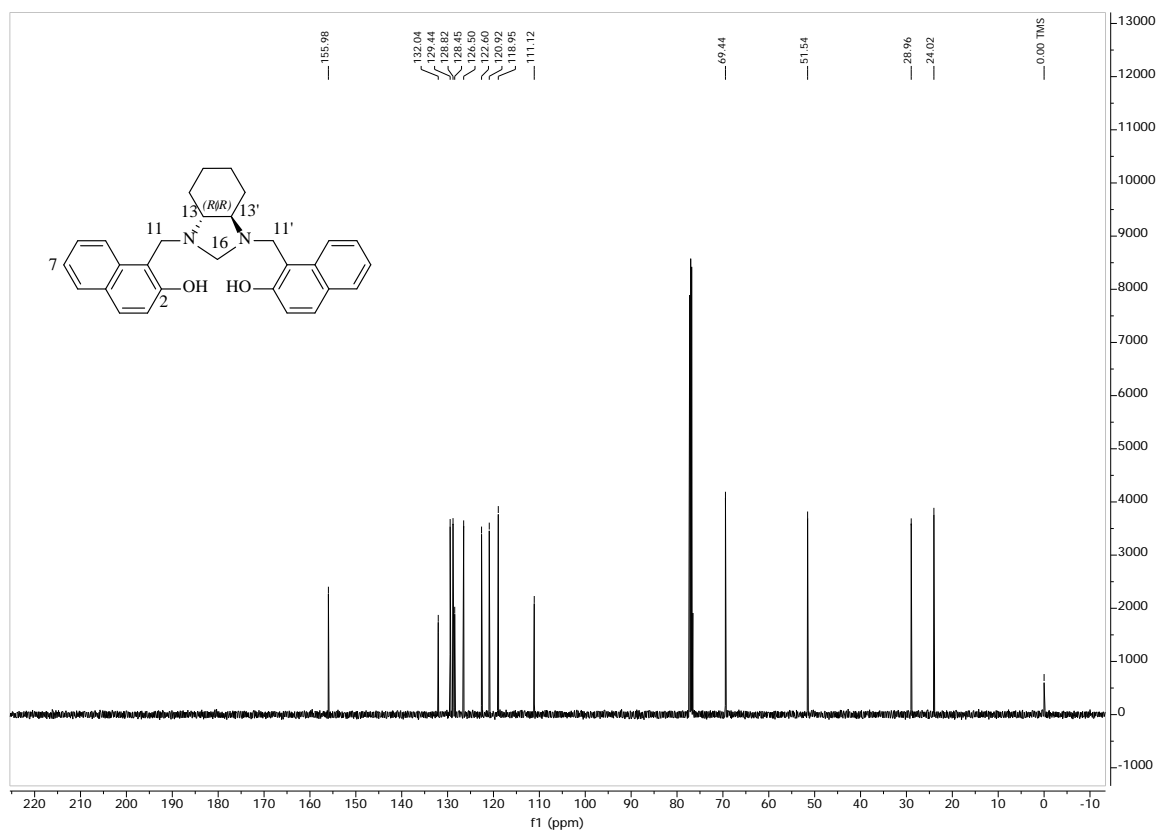

Figure S19. The  $^{13}\text{C}$  NMR spectrum of compound (*R,R*)-9.

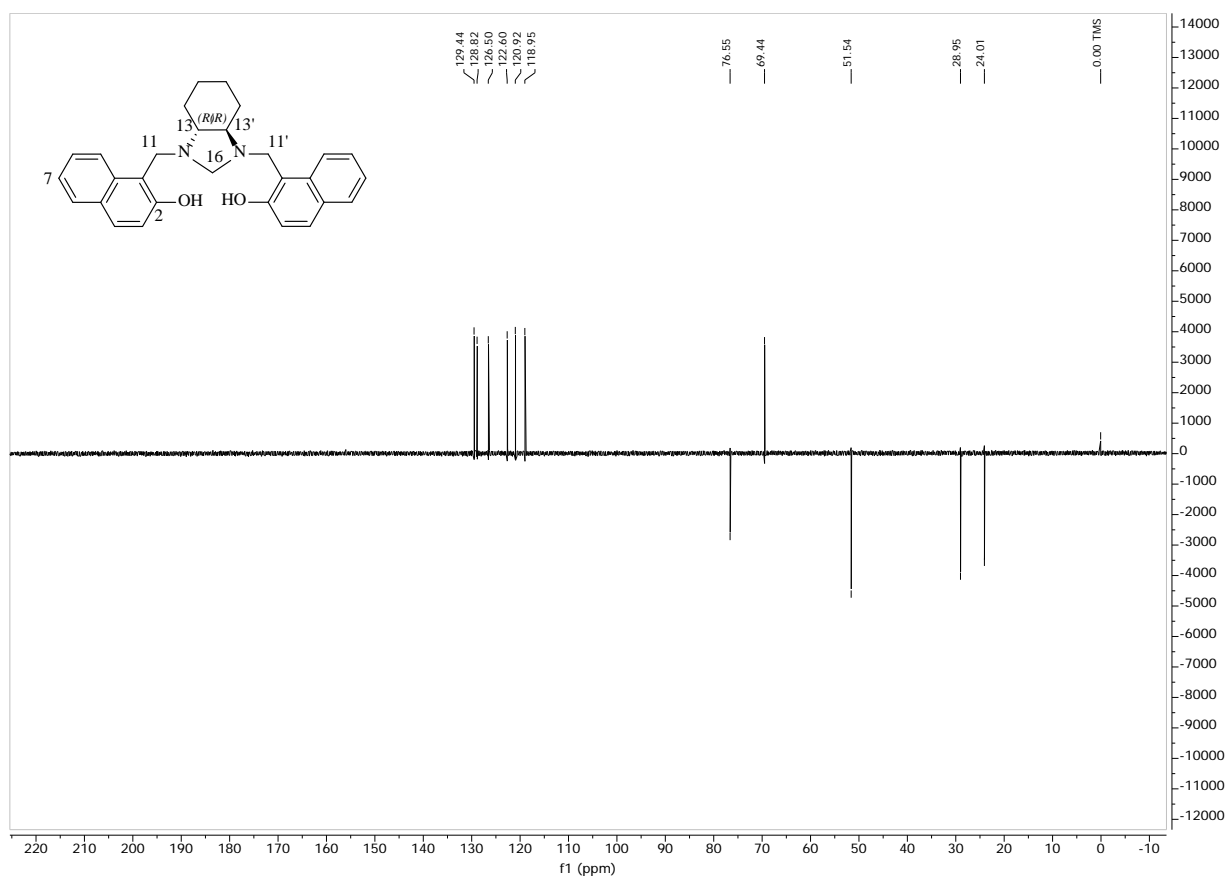

Figure S20. The DEPT 135 NMR spectrum of compound  $(R,R)$ -9.

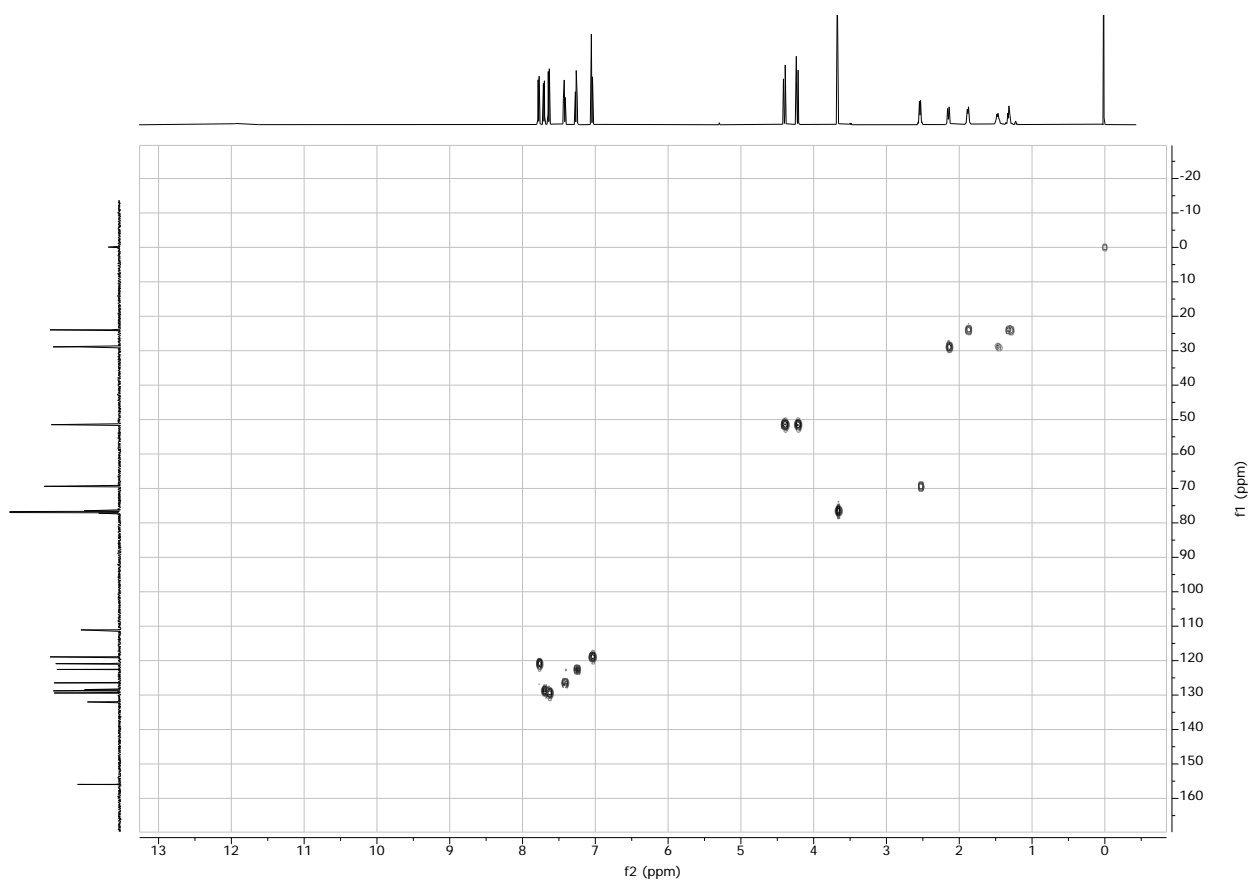

Figure S21. The HSQC NMR spectrum of compound  $(R,R)$ -9.

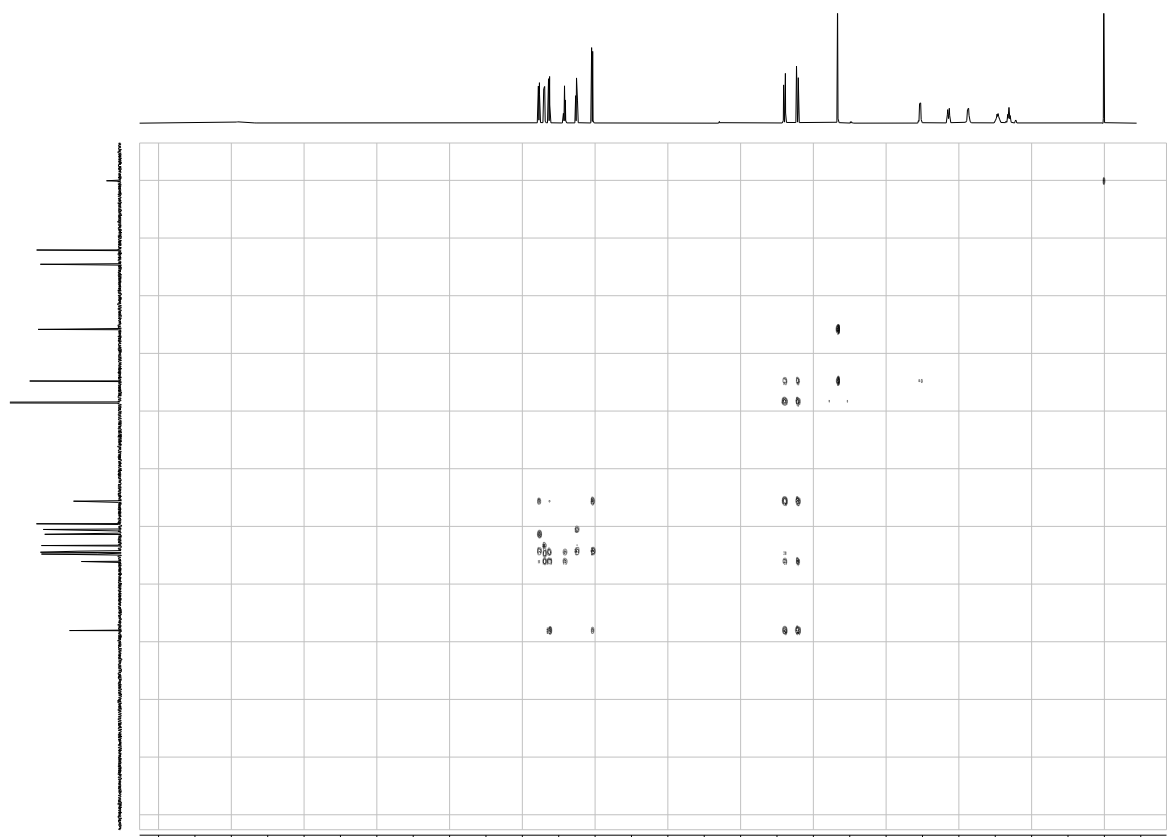

Figure S22. The HMBC NMR spectrum of compound (*R,R*)-**9**.

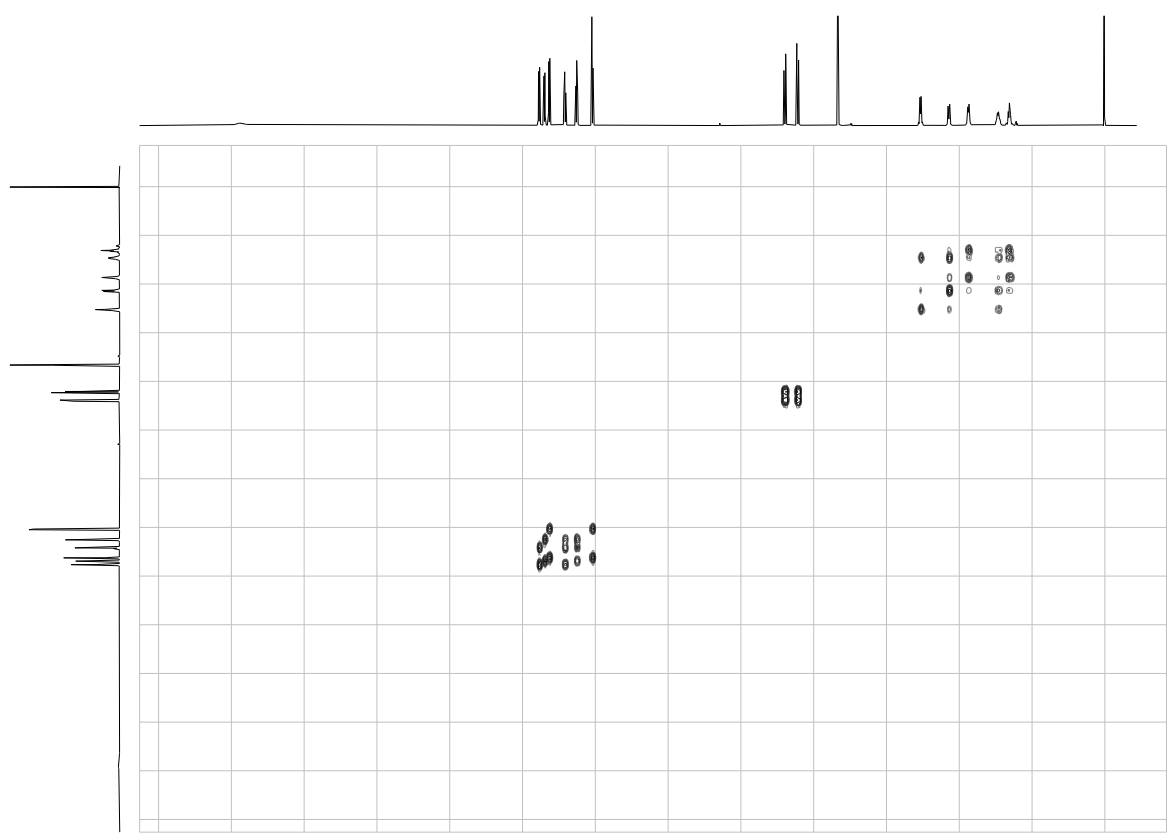

Figure S23. The COSY NMR spectrum of compound (*R,R*)-**9**.



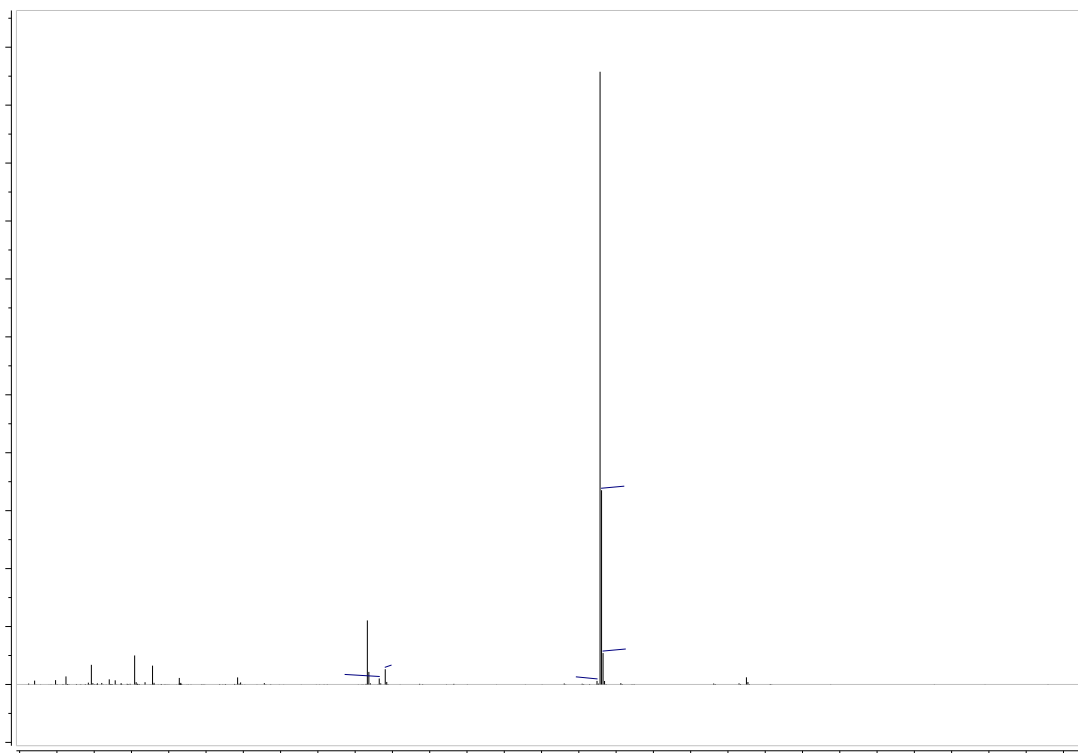

Figure S24. The HRMS spectrum of compound (R,R)-9.

Table S1. Most important data collection and refinement parameters for compounds **3** and (*R,R*)-**9**.

| Compound                                                     | 3                                                             | ( <i>R,R</i> )-9                                              |
|--------------------------------------------------------------|---------------------------------------------------------------|---------------------------------------------------------------|
| Empirical formula                                            | C <sub>25</sub> H <sub>30</sub> N <sub>2</sub> O <sub>2</sub> | C <sub>29</sub> H <sub>30</sub> N <sub>2</sub> O <sub>2</sub> |
| Formula weight                                               | 450.56                                                        | 438.55                                                        |
| Temperature                                                  | 290 K                                                         | 290 K                                                         |
| Crystal system                                               | Monoclinic                                                    | Orthorhombic                                                  |
| Space group                                                  | <i>P</i> 2 <sub>1</sub>                                       | <i>P</i> 2 <sub>1</sub> 2 <sub>1</sub> 2 <sub>1</sub>         |
| <i>a</i> /Å                                                  | 15.1999(9)                                                    | 9.5093(3)                                                     |
| <i>b</i> /Å                                                  | 5.1934(3)                                                     | 9.9852(3)                                                     |
| <i>c</i> /Å                                                  | 15.9835(12)                                                   | 25.2395(9)                                                    |
| $\alpha$ /°                                                  | 90                                                            | 90                                                            |
| $\beta$ /°                                                   | 109.169(7)                                                    | 90                                                            |
| $\gamma$ /°                                                  | 90                                                            | 90                                                            |
| Volume/Å <sup>3</sup>                                        | 1191.77(14)                                                   | 2396.55(13)                                                   |
| <i>Z</i>                                                     | 2                                                             | 4                                                             |
| $\rho_{\text{calc}}$ /cm <sup>3</sup>                        | 1.256                                                         | 1.215                                                         |
| $\mu$ /mm <sup>-1</sup>                                      | 0.079                                                         | 0.076                                                         |
| <i>F</i> (000)                                               | 480.0                                                         | 936.0                                                         |
| Crystal size/mm <sup>3</sup>                                 | 0.25 × 0.25 × 0.2                                             | 0.3 × 0.2 × 0.15                                              |
| Radiation                                                    | MoK $\alpha$ ( $\lambda$ = 0.71073)                           | MoK $\alpha$ ( $\lambda$ = 0.71073)                           |
| 2 $\theta$ range for data collection/°                       | 5.424 to 57.972                                               | 4.578 to 56.614                                               |
| Reflections collected/independent                            | 5806/4188                                                     | 38835/5910                                                    |
| <i>R</i> <sub>int</sub> / <i>R</i> <sub>sigma</sub>          | 0.0275/0.0549                                                 | 0.0290, 0.0199                                                |
| Data/restraints/parameters                                   | 4188/1/310                                                    | 5910/0/298                                                    |
| Goodness-of-fit on <i>F</i> <sup>2</sup>                     | 1.061                                                         | 1.075                                                         |
| Final <i>R</i> indexes [ <i>I</i> ≥ 2 $\sigma$ ( <i>I</i> )] | <i>R</i> 1 = 0.0600,<br>w <i>R</i> 2 = 0.1433                 | <i>R</i> 1 = 0.0509,<br>w <i>R</i> 2 = 0.1253                 |
| Final <i>R</i> indexes [all data]                            | <i>R</i> 1 = 0.0947,<br>w <i>R</i> 2 = 0.1643                 | <i>R</i> 1 = 0.0635,<br>w <i>R</i> 2 = 0.1332                 |
| Largest diff. peak/hole / e Å <sup>-3</sup>                  | 0.18/-0.17                                                    | 0.14/-0.13                                                    |
| Flack parameter                                              | -1.8(10)                                                      | -0.4(3)                                                       |
| CCDC number                                                  | 2294902                                                       | 2294903                                                       |
